# Supplementary material for: Experimental and Theoretical Studies on the Anti-Amyloidogenic and Destabilizing Effects of Pyrogallol Against Human Insulin Protein
Source: Preprints.org preprint supplement (doi:10.20944/preprints202202.0012.v1), 2022-02-01
Supplement: Supplementary file 2 [file supplementary]

**De Dear Prof Dr. Fay Li**

**Assistant Editor of the Molecules**

In response to your email about sending an article for a special issue “Recent Advances in Natural Drug Discovery and Development” in Molecule Journal, we submitted an article entitled: “Experimental and theoretical studies on the anti-amyloidogenic and destabilizing effects of pyrogallol against Human insulin protein” to be evaluated in the Molecules. In this study, it was found that Py has a very acceptable function both as an inhibitor in preventing the formation of amyloid fibrils and as a destabilizer in eliminating pre-formed amyloid fibrils. Since various studies have shown that natural polyphenols have special properties to prevent amyloid disease, the present study could be useful in advancing the design purposes of new anti-amyloid drugs in the future

We have done our best to follow "the instructions for authors" and we hope our goal has been achieved. I confirm that this work is original and has not been published elsewhere, nor is it currently under consideration for publication elsewhere.

I thank you very much for your time and kind consideration and hoping to hear from you.

With best regards,

**S. Bahramikia**

**Assistant Professor. Lorestan University**
